# Supplementary material
Source: PubMed Central journal article supplement (PMC6327249)
Supplement: bi8b00925_si_001.pdf [file bi8b00925_si_001.pdf]

## **Supporting Information**

A screen for membrane fission catalysts identifies the ATPase EHD1

Sukrut C. Kamerkar, Krishnendu Roy, Soumya Bhattacharyya and Thomas J. Pucadyil

Indian Institute of Science Education and Research, Dr. Homi Bhabha Road, Pashan, Pune  
411008, Maharashtra, India.

**Table S1.** List of all proteins identified from mass spectrometry in the active fraction.

**Table S2.** List of proteins with unique peptide sequences.

**Table S3.** List of putative ATP-binding proteins.
